# Supplementary material for: Fungal Endophytes of Vitis vinifera—Plant Growth Promoters or Potentially Toxinogenic Agents?
Source: MDPI journal article supplement (doi:10.3390/toxins14020066), 2022-01-19
Supplement: s1 [file s1]

# Fungal Endophytes of *Vitis vinifera* – Plant Growth Promoters or Potentially Toxinogenic Agents?

Milena Stranska, Zbynek Dzuman, Nela Prusova, Adam Behner, Irena Kolouchova, Petra Lovecka, Tomas Rezanka, Miroslav Kolarik and Jana Hajslova

**Table S1.** Overview of certified mycotoxin standards.

| No. | Mycotoxin                  | CAS         | Producer   |
|-----|----------------------------|-------------|------------|
| 1   | 15-Acetyldeoxynivalenol    | 88337-96-6  | Romer Labs |
| 2   | 3-Acetyldeoxynivalenol     | 50722-38-8  | Romer Labs |
| 3   | Aflatoxin B1               | 1162-65-8   | Merck      |
| 4   | Aflatoxin B2               | 7220-81-7   | Merck      |
| 5   | Aflatoxin G1               | 1165-39-5   | Merck      |
| 6   | Aflatoxin G2               | 7241-98-7   | Merck      |
| 7   | Agroclavine                | 548-42-5    | Romer Labs |
| 8   | Alternariol                | 641-38-3    | Merck      |
| 9   | Alternariol methyl ether   | 23452-05-3  | Merck      |
| 10  | Beauvericin                | 26048-05-5  | Merck      |
| 11  | Citrinin                   | 518_75-2    | Merck      |
| 12  | Cyclopiazonic acid         | 18172-33-3  | Merck      |
| 13  | Deoxynivalenol             | 51481-10-8  | Merck      |
| 14  | Diacetoxyscirpenol         | 2270-40-8   | Merck      |
| 15  | Deoxynivalenol-3-glucoside | 131180-21-7 | Romer Labs |
| 16  | Enniatin A                 | 2503-13-1   | Merck      |
| 17  | Enniatin A1                | 4530-21-6   | Merck      |
| 18  | Enniatin B                 | 917-13-5    | Merck      |
| 19  | Enniatin B1                | 19914-20-6  | Merck      |
| 20  | Ergocornine                | 57432-60-7  | Romer Labs |
| 21  | Ergocorninine              | 564-37-4    | Romer Labs |
| 22  | Ergocristine               | 511-08-0    | Romer Labs |
| 23  | Ergocristinine             | 511-07-9    | Romer Labs |
| 24  | Ergocryptine               | 2706-66-3   | Romer Labs |
| 25  | Ergocryptinine             | 511-10-4    | Romer Labs |
| 26  | Ergometrine                | 60-79-7     | Romer Labs |
| 27  | Ergosine                   | 561-94-4    | Romer Labs |
| 28  | Ergosinine                 | 596-88-3    | Romer Labs |
| 29  | Ergotamine                 | 113-15-5    | Romer Labs |
| 30  | Ergotaminine               | 639-81-6    | Romer Labs |
| 31  | Fumonisin B1               | 116355-83-0 | Merck      |
| 32  | Fumonisin B2               | 116355-84-1 | Merck      |
| 33  | Fumonisin B3               | 136379-59-4 | Romer Labs |
| 34  | Fusarenon X                | 23255-69-8  | Merck      |
| 35  | Glilotoxin                 | 67-99-2     | Merck      |
| 36  | HT-2 toxin                 | 26934-87-2  | Romer Labs |
| 37  | Meleagrins                 | 71751-77-4  | Romer Labs |
| 38  | Mycophenolic acid          | 24280-93-1  | Merck      |
| 39  | Neosolaniol                | 36519-25-2  | Merck      |

| No. | Mycotoxin            | CAS         | Producer           |
|-----|----------------------|-------------|--------------------|
| 40  | Nivalenol            | 23282-20-4  | Romer Labs         |
| 41  | Ochratoxin A         | 303-47-9    | Merck              |
| 42  | Patulin              | 149-29-1    | Merck              |
| 43  | Paxilline            | 57186-25-1  | Merck              |
| 44  | Penicillic acid      | 90-65-3     | Merck              |
| 45  | Penitrem A           | 12627-35-9  | Merck              |
| 46  | Phomopsis A          | 64925-80-0  | Enzo Life Sciences |
| 47  | Roquefortine C       | 58735-64-1  | Merck              |
| 48  | Stachybotrylactam    | 163391-76-2 | Romer Labs         |
| 49  | Sterigmatocystin     | 10048-13-2  | Merck              |
| 50  | T-2 toxin            | 21259-20-1  | Romer Labs         |
| 51  | Tenuazonic acid      | 610-88-8    | Romer Labs         |
| 52  | Tentoxin             | 28540-82-1  | Romer Labs         |
| 53  | Verrucarol           | 2198-92-7   | Merck              |
| 54  | Verruculogen         | 12771-72-1  | Romer Labs         |
| 55  | Zearalenone          | 17924-92-4  | Romer Labs         |
| 56  | $\alpha$ -zearalenol | 364-55-72-8 | Merck              |
| 57  | $\beta$ -zearalenol  | 71030-11-0  | Merck              |

**Table S2.** Overview of retention times and exact masses (m/z) of precursor ions and fragments of mycotoxins, together with normalized collision energies (NCE); precursor ions for fragmentation are highlighted.

| N o. | Mycotoxin                 | Summary formula | RT (min) | ESI(−)             |                                       | ESI(+)             |                                   | NC E (%) | Fragment 1      |           | Fragment 2      |          |
|------|---------------------------|-----------------|----------|--------------------|---------------------------------------|--------------------|-----------------------------------|----------|-----------------|-----------|-----------------|----------|
|      |                           |                 |          | [M−H] <sup>−</sup> | [M+CH <sub>3</sub> −COO] <sup>−</sup> | [M+H] <sup>+</sup> | [M+NH <sub>4</sub> ] <sup>+</sup> |          | Summary formula | m/z       | Summary formula | m/z      |
| 1    | 15-Acetyldeoxynivalenol   | C17H22O7        | 2.69     | 337.1293           | 397.1504                              | 339.1438           | 356.1704                          | 10       | C17H23O7        | 339.1438  | C17H21O6        | 321.1333 |
| 2    | 3-Acetyldeoxynivalenol*   | C17H22O7        | 2.57     | 337.1293           | 397.1504                              | 339.1438           | 356.1704                          | 10       | C2H3O2          | 59.0138   | C17H21O7        | 337.1292 |
| 3    | Aflatoxin B1              | C17H12O6        | 3.45     | 311.0561           | 371.0772                              | 313.0707           | 330.0972                          | 60       | C14H9O4         | 241a.0495 | C15H9O5         | 269.0444 |
| 4    | Aflatoxin B2              | C17H14O6        | 3.26     | 313.0718           | 373.0929                              | 315.0863           | 332.1129                          | 70       | C14H11O5        | 259.0601  | C14H11O4        | 243.0652 |
| 5    | Aflatoxin G1              | C17H12O7        | 3.01     | 327.0510           | 387.0722                              | 329.0656           | 346.0921                          | 60       | C13H11O3        | 215.0703  | C14H11O4        | 243.0652 |
| 6    | Aflatoxin G2              | C17H14O7        | 2.85     | 329.0667           | 389.0878                              | 331.0812           | 348.1078                          | 60       | C14H13O4        | 245.0808  | C13H13O3        | 217.0859 |
| 7    | Agroclavine               | C16H18N2        | 2.36     | 237.1397           | 297.1609                              | 239.1543           | 256.1808                          | 50       | C15H14N         | 208.1121  | C12H11N2        | 183.0917 |
| 8    | Alternariol*              | C14H10O5        | 3.41     | 257.0455           | 317.0667                              | 259.0601           | 276.0866                          | 70       | C12H7O4         | 215.0350  | C9H7O2          | 147.0452 |
| 9    | Alternariol methyl ether* | C15H12O5        | 4.03     | 271.0612           | 331.0823                              | 273.0758           | 290.1023                          | 60       | C14H8O5         | 256.0377  | C13H8O4         | 228.0428 |
| 10   | Beauvericin               | C45H57N3O9      | 7.98     | 782.4022           | 842.4233                              | 784.4168           | 801.4433                          | 30       | C15H18O2N       | 244.1332  | C9H12N          | 134.0964 |
| 11   | Citrinin*                 | C13H14O5        | 2.87     | 249.0768           | 309.0980                              | 251.0914           | 268.1179                          | 50       | C13H13O4        | 233.0808  | C13H15O5        | 251.0914 |

| N<br>o. | Mycotoxin                       | Summary<br>formula | RT<br>(min) | ESI(−)             |                                      | ESI(+)             |                                   | NC<br>E (%) | Fragment 1         |              | Fragment 2         |              |
|---------|---------------------------------|--------------------|-------------|--------------------|--------------------------------------|--------------------|-----------------------------------|-------------|--------------------|--------------|--------------------|--------------|
|         |                                 |                    |             | [M−H] <sup>−</sup> | [M+CH <sub>3</sub> COO] <sup>−</sup> | [M+H] <sup>+</sup> | [M+NH <sub>4</sub> ] <sup>+</sup> |             | Summary<br>formula | m/z          | Summary<br>formula | m/z          |
| 12      | Cyclopiazonic<br>acid*          | C20H20N2<br>O3     | 3.06        | 335.140<br>1       | 395.1612                             | 337.15<br>47       | 354.181<br>2                      | 50          | C6H6O3N            | 140.035<br>3 | C11H8N             | 154.066<br>2 |
| 13      | Deoxynivalenol*                 | C15H20O6           | 2.07        | 295.118<br>7       | 355.1398                             | 297.13<br>33       | 314.159<br>8                      | 10          | C2H3O2             | 59.0139      | C15H19O6           | 295.118<br>7 |
| 14      | Deoxynivalenol-3-<br>glucoside* | C21H30O11          | 1.98        | 457.171<br>5       | 517.1927                             | 459.18<br>61       | 476.212<br>6                      | 20          | C20H27O10          | 427.161<br>0 | C21H29O1           | 457.171<br>5 |
| 15      | Diacetoxyscirpeno<br>1          | C19H26O7           | 3.53        | 365.160<br>6       | 425.1817                             | 367.17<br>51       | 384.201<br>7                      | 20          | C17H23O5           | 307.154<br>0 | C15H17O2           | 229.122<br>3 |
| 16      | Enniatin A                      | C36H63N3<br>O9     | 8.36        | 680.449<br>2       | 740.4703                             | 682.46<br>37       | 699.490<br>3                      | 20          | C12H20O2N          | 210.148<br>9 | C36H64O9<br>N3     | 682.463<br>7 |
| 17      | Enniatin A1                     | C35H61N3<br>O9     | 8.20        | 666.433<br>5       | 726.4546                             | 668.44<br>81       | 685.474<br>6                      | 20          | C35H62O9N<br>3     | 668.448<br>1 | C12H20O2<br>N      | 210.148<br>9 |
| 18      | Enniatin B                      | C33H57N3<br>O9     | 7.83        | 638.402<br>2       | 698.4233                             | 640.41<br>68       | 657.443<br>3                      | 30          | C11H18O2N          | 196.133<br>2 | C11H20O3<br>N      | 214.143<br>8 |
| 19      | Enniatin B1                     | C34H59N3<br>O9     | 8.03        | 652.417<br>9       | 712.4390                             | 654.43<br>24       | 671.459<br>0                      | 30          | C34H60O9N<br>3     | 654.432<br>4 | C11H18O2<br>N      | 196.133<br>2 |
| 20      | Ergocornine                     | C31H39N5<br>O5     | 3.27        | 560.287<br>8       | 620.3090                             | 562.30<br>24       | 579.328<br>9                      | 30          | C16H18ON3          | 268.144<br>4 | C15H15N2           | 223.123<br>0 |
| 21      | Ergocorninine                   | C31H39N5<br>O5     | 3.81        | 560.287<br>8       | 620.3090                             | 562.30<br>24       | 579.328<br>9                      | 30          | C19H17O2N<br>2     | 305.128<br>5 | C15H15N2           | 223.123<br>0 |
| 22      | Ergocristine                    | C35H39N5<br>O5     | 3.72        | 608.287<br>8       | 668.3090                             | 610.30<br>24       | 627.328<br>9                      | 30          | C15H15N2           | 223.123<br>0 | C16H18N3<br>O      | 268.144<br>4 |
| 23      | Ergocristinine                  | C35H39N5<br>O5     | 4.25        | 608.287<br>8       | 668.3090                             | 610.30<br>24       | 627.328<br>9                      | 30          | C15H15N2           | 223.123<br>0 | C19H17O2<br>N2     | 305.128<br>5 |
| 24      | Ergocryptine                    | C32H41N5<br>O5     | 3.67        | 574.303<br>5       | 634.3246                             | 576.31<br>80       | 593.344<br>6                      | 30          | C16H18N3O          | 268.144<br>4 | C15H15N2           | 223.123<br>0 |
| 25      | Ergocryptinine                  | C32H41N5<br>O5     | 4.14        | 574.303<br>5       | 634.3246                             | 576.31<br>80       | 593.344<br>6                      | 30          | C15H15N2           | 223.123<br>0 | C17H19N2<br>O2     | 283.144<br>1 |
| 26      | Ergometrine                     | C19H23N3<br>O2     | 1.87        | 324.171<br>8       | 384.1929                             | 326.18<br>63       | 343.212<br>9                      | 50          | C14H10NO           | 208.075<br>7 | C15H15N2           | 223.123<br>0 |
| 27      | Ergosine                        | C30H37N5<br>O5     | 3.01        | 546.272<br>2       | 606.2933                             | 548.28<br>67       | 565.313<br>3                      | 30          | C15H15N2           | 223.123<br>0 | C16H18N3<br>O      | 268.144<br>4 |
| 28      | Ergosinine                      | C30H37N5<br>O5     | 3.10        | 546.272<br>2       | 606.2933                             | 548.28<br>67       | 565.313<br>3                      | 30          | C15H15N2           | 223.123<br>0 | C16H18N3<br>O      | 268.144<br>4 |
| 29      | Ergotamine                      | C33H35N5<br>O5     | 3.15        | 580.256<br>5       | 640.2777                             | 582.27<br>11       | 599.297<br>6                      | 30          | C15H15N2           | 223.123<br>0 | C17H17N2<br>O3     | 297.123<br>4 |
| 30      | Ergotaminine                    | C33H35N5<br>O5     | 3.20        | 580.256<br>5       | 640.2777                             | 582.27<br>11       | 599.297<br>6                      | 30          | C15H15N2           | 223.123<br>0 | C14H10NO           | 208.075<br>7 |
| 31      | Fumonisin B1                    | C34H59NO<br>15     | 4.37        | 720.381<br>2       | 780.4023                             | 722.39<br>57       | 739.422<br>3                      | 30          | C22H40ON           | 334.310<br>4 | C22H44O3<br>N      | 370.331<br>6 |
| 32      | Fumonisin B2                    | C34H59NO<br>14     | 5.46        | 704.386<br>3       | 764.4074                             | 706.40<br>08       | 723.427<br>4                      | 30          | C22H42ON           | 336.326<br>1 | C22H40N            | 318.315<br>5 |
| 33      | Fumonisin B3                    | C34H59NO<br>14     | 4.99        | 704.386<br>3       | 764.4074                             | 706.40<br>08       | 723.427<br>4                      | 30          | C22H42ON           | 336.326<br>1 | C22H44O2<br>N      | 354.336<br>7 |
| 34      | Fusarenon X*                    | C17H22O8           | 2.23        | 353.124<br>2       | 413.1453                             | 355.13<br>87       | 372.165<br>3                      | 10          | C2H3O2             | 59.0139      | C17H21O8           | 353.124<br>2 |
| 35      | Gliotoxin*                      | C13H14N2<br>O4S2   | 3.09        | 325.032<br>2       | 385.0534                             | 327.04<br>68       | 344.073<br>3                      | 10          | C2H6O2NS           | 108.011<br>4 | C5H5O4NS           | 174.993<br>4 |

| No. | Mycotoxin         | Summary formula | RT (min) | ESI(−)             |                                      | ESI(+)             |                                   | NC E (%) | Fragment 1      |          | Fragment 2      |          |
|-----|-------------------|-----------------|----------|--------------------|--------------------------------------|--------------------|-----------------------------------|----------|-----------------|----------|-----------------|----------|
|     |                   |                 |          | [M−H] <sup>−</sup> | [M+CH <sub>3</sub> COO] <sup>−</sup> | [M+H] <sup>+</sup> | [M+NH <sub>4</sub> ] <sup>+</sup> |          | Summary formula | m/z      | Summary formula | m/z      |
| 36  | HT-2 toxin        | C22H32O8        | 4.27     | 423.2024           | 483.2236                             | 425.2170           | 442.2435                          | 10       | C15H19O4        | 263.1278 | C14H15O2        | 215.1067 |
| 37  | Meleagrins        | C23H23N5O4      | 3.44     | 432.1677           | 492.1889                             | 434.1823           | 451.2088                          | 30       | C17H12O3N5      | 334.0935 | C22H21O3        | 403.1639 |
| 38  | Mycophenolic acid | C17H20O6        | 4.68     | 319.1187           | 379.1398                             | 321.1333           | 338.1598                          | 50       | C11H11O4        | 207.0652 | C10H9O3         | 177.0546 |
| 39  | Neosolaniol       | C19H26O8        | 2.30     | 381.1555           | 441.1766                             | 383.1700           | 400.1966                          | 10       | C17H21O5        | 305.1384 | C15H17O3        | 245.1172 |
| 40  | Nivalenol*        | C15H20O7        | 1.82     | 311.1136           | 371.1348                             | 313.1282           | 330.1547                          | 10       | C2H3O2          | 59.0139  | C14H17O6        | 281.1031 |
| 41  | Ochratoxin A      | C20H18ClN6O     | 5.34     | 402.0750           | 462.0961                             | 404.0895           | 421.1161                          | 20       | C19H17O4NCl     | 358.0841 | C11H8O4C        | 239.0106 |
| 42  | Patulin*          | C7H6O4          | 1.82     | 153.0193           | 213.0405                             | 155.0339           | 172.0604                          | 30       | C6H5O2          | 109.0295 | C5H5O           | 81.0346  |
| 43  | Paxilline         | C27H33NO4       | 6.93     | 434.2337           | 494.2548                             | 436.2482           | 453.2748                          | 20       | C27H32O3N       | 418.2377 | C9H8N           | 130.0651 |
| 44  | Penicillic acid   | C8H10O4         | 2.08     | 169.0506           | 229.0718                             | 171.0652           | 188.0917                          | 40       | C7H9O2          | 125.0597 | C6H9O           | 97.0648  |
| 45  | Penitrem A*       | C37H44NO6Cl     | 4.42     | 632.2784           | 692.2996                             | 634.2930           | 651.3195                          | 40       | C32H33O5NCl     | 546.2053 | C26H23O2        | 416.1423 |
| 46  | Phomopsis A       | C36H45ClN6O12   | 2.60     | 787.2711           | 847.2923                             | 789.2857           | 806.3122                          | 10       | C12H15O5N3      | 281.1006 | C9H18O8N        | 282.1058 |
| 47  | Roquefortine C    | C22H23N5O2      | 4.22     | 388.1779           | 448.1990                             | 390.1925           | 407.2190                          | 40       | C8H9O2N4        | 193.0720 | C17H16O2        | 322.1299 |
| 48  | Stachybotrylactam | C23H31NO4       | 6.31     | 384.2180           | 444.2392                             | 386.2326           | 403.2591                          | 60       | C9H8O3N         | 178.0499 | C8H8O2N         | 150.0550 |
| 49  | Sterigmatocystin  | C18H12O6        | 5.68     | 323.0561           | 383.0772                             | 325.0707           | 342.0972                          | 50       | C17H10O6        | 310.0472 | C16H9O5         | 281.0444 |
| 50  | T-2 toxin         | C24H34O9        | 4.89     | 465.2130           | 525.2341                             | 467.2276           | 484.2541                          | 10       | C21H31O7        | 395.2064 | C12H17O4        | 225.1121 |
| 51  | Tentoxin          | C22H30N4O4      | 4.58     | 413.2194           | 473.2406                             | 415.2340           | 432.2605                          | 30       | C18H22O2N3      | 312.1707 | C9H19ON2        | 171.1492 |
| 52  | Tenuazonic acid   | C10H15NO3       | 3.74     | 196.0979           | 256.1190                             | 198.1125           | 215.1390                          | 45       | C6H5O3          | 125.0233 | C9H13O2         | 153.0910 |
| 53  | Verrucarol        | C15H22O4        | 2.53     | 265.1445           | 325.1657                             | 267.1591           | 284.1856                          | 10       | C15H21O3        | 249.1485 | C15H19O2        | 231.1380 |
| 54  | Verruculogen      | C27H33N3O7      | 6.09     | 510.2246           | 570.2457                             | 512.2391           | 529.2657                          | 20       | C19H18O4N3      | 352.1292 | C19H20O5        | 370.1397 |
| 55  | Zearalenone*      | C18H22O5        | 3.85     | 317.1394           | 377.1606                             | 319.1540           | 336.1805                          | 50       | C9H7O           | 131.0502 | C10H7O3         | 175.0401 |
| 56  | α-zearalenol*     | C18H24O5        | 3.75     | 319.1551           | 379.1762                             | 321.1697           | 338.1962                          | 60       | C9H4O3          | 160.0166 | C9H6O           | 130.0424 |
| 57  | β-zearalenol*     | C18H24O5        | 3.53     | 319.1551           | 379.1762                             | 321.1697           | 338.1962                          | 60       | C9H6O           | 130.0424 | C9H4O3          | 160.0166 |

\* Fragment ions are sorted according to decreasing signal, fragment 1 was thus used for quantification for analytes determined in parallel reaction monitoring (PRM) mode (ESI−).
